# Supplementary material for: Near-perfect precise on-target editing of human hematopoietic stem and progenitor cells
Source: eLife journal article supplement (doi:10.7554/elife.91288), 2023-10-05
Supplement: data3 [file Source Data - Figure 1C-D.xlsx]

## Sheet:  Figure 1C-D AAV MOI test SRSF2
Gene	Donor	RNP	concentration	non-cutting	cutting	score	sex	cell number
SRSF2	NA	NA	0	823	0	0	NA	NA
SRSF2	ctrl	no	0	NA	NA	0	M	295000
SRSF2	RNP	yes	0	NA	NA	0	M	245000
SRSF2	NA	NA	0	823	0	0	NA	NA
SRSF2	AAV	no	200	NA	NA	0	M	200000
SRSF2	AAV	yes	200	406	47	0.103752759	M	145000
SRSF2	AAV	no	400	NA	NA	0	M	185000
SRSF2	AAV	yes	400	294	59	0.16713881	M	135000
SRSF2	AAV	no	800	NA	NA	0	M	180000
SRSF2	AAV	yes	800	204	117	0.364485981	M	100000
SRSF2	ctrl	no	0	NA	NA	0	F	270000
SRSF2	RNP	yes	0	NA	NA	0	F	325000
SRSF2	AAV	no	200	NA	NA	0	F	240000
SRSF2	AAV	yes	200	506	44	0.08166969	F	180000
SRSF2	AAV	no	400	NA	NA	0	F	210000
SRSF2	AAV	yes	400	437	103	0.19074074	F	170000
SRSF2	AAV	no	800	NA	NA	0	F	160000
SRSF2	AAV	yes	800	295	196	0.39918534	F	145000
SRSF2	ctrl	no	0	NA	NA	0	M	445000
SRSF2	RNP	yes	0	NA	NA	0	M	435000
SRSF2	AAV	no	200	NA	NA	0	M	425000
SRSF2	AAV	yes	200	1068	165	0.13381995	M	410000
SRSF2	AAV	no	400	NA	NA	0	M	385000
SRSF2	AAV	yes	400	952	294	0.23595506	M	330000
SRSF2	AAV	no	800	NA	NA	0	M	285000
SRSF2	AAV	yes	800	609	369	0.37730061	M	285000
