# Supplementary material for: Near-perfect precise on-target editing of human hematopoietic stem and progenitor cells
Source: eLife journal article supplement (doi:10.7554/elife.91288), 2023-10-05
Supplement: data3 [file Source Data - Figure 1E-F.xlsx]

## Sheet: Figure 1E-F short long donors
Gene	Donor	RNP	concentration	non-cutting	cutting	score	sex	Cellnumber
SRSF2	NA	NA	0	823	0	0	NA	NA
SRSF2	ctrl	no	0	839	0	0	F	247500
SRSF2	rnp	yes	0	560	0	0	F	107500
SRSF2	NA	NA	0	723	0	0	NA	NA
SRSF2	short	no	1	856	0	0	F	52500
SRSF2	short	yes	1	411	0	0	F	27500
SRSF2	short	no	2.5	802	0	0	F	17500
SRSF2	short	yes	2.5	234	33	0.12359551	F	10000
SRSF2	short	no	5	963	0	0	F	10000
SRSF2	short	yes	5	683	212	0.23687151	F	7500
SRSF2	NA	NA	0	909	0	0	NA	NA
SRSF2	long	no	0.25	688	0	0	F	47500
SRSF2	long	yes	0.25	289	0	0	F	25000
SRSF2	long	no	0.5	796	0	0	F	20000
SRSF2	long	yes	0.5	296	0	0	F	10000
SRSF2	long	no	1	746	0	0	F	7500
SRSF2	long	yes	1	423	34	0.07439825	F	5000
SRSF2	NA	NA	0	823	0	0	NA	NA
SRSF2	ctrl	no	0	647	0	0	F	360000
SRSF2	rnp	yes	0	286	0	0	F	310000
SRSF2	NA	NA	0	723	0	0	NA	NA
SRSF2	short	no	1	1027	0	0	F	230000
SRSF2	short	yes	1	342	20	0.05524862	F	222500
SRSF2	short	no	2.5	905	0	0	F	175000
SRSF2	short	yes	2.5	732	108	0.12857143	F	132500
SRSF2	short	no	5	714	0	0	F	115000
SRSF2	short	yes	5	605	138	0.18573351	F	80000
SRSF2	NA	NA	0	909	0	0	NA	NA
SRSF2	long	no	0.25	468	0	0	F	175000
SRSF2	long	yes	0.25	361	0	0	F	197500
SRSF2	long	no	0.5	1019	0	0	F	115000
SRSF2	long	yes	0.5	563	0	0	F	100000
SRSF2	long	no	1	940	0	0	F	55000
SRSF2	long	yes	1	681	5	0.00728863	F	52500
SRSF2	NA	NA	0	823	0	0	NA	NA
SRSF2	ctrl	no	0	998	0	0	M	365000
SRSF2	rnp	yes	0	674	0	0	M	330000
SRSF2	NA	NA	0	723	0	0	NA	NA
SRSF2	short	no	1	863	0	0	M	120000
SRSF2	short	yes	1	674	7	0.010279	M	145000
SRSF2	short	no	2.5	420	0	0	M	105000
SRSF2	short	yes	2.5	698	77	0.10052219	M	97500
SRSF2	short	no	5	524	0	0	M	65000
SRSF2	short	yes	5	614	89	0.12660028	M	55000
SRSF2	NA	NA	0	909	0	0	NA	NA
SRSF2	long	no	0.25	1158	0	0	M	140000
SRSF2	long	yes	0.25	766	0	0	M	117500
SRSF2	long	no	0.5	906	0	0	M	85000
SRSF2	long	yes	0.5	682	0	0	M	65000
SRSF2	long	no	1	466	0	0	M	40000
SRSF2	long	yes	1	671	5	0.00739645	M	30000
