# Supplementary material for: Near-perfect precise on-target editing of human hematopoietic stem and progenitor cells
Source: eLife journal article supplement (doi:10.7554/elife.91288), 2023-10-05
Supplement: data3 [file Source Data - Figure 2C-D-G and S3.xlsx]

## Sheet: Figure 2C-D-G and S3 molecule
Conditions	Gene	type	mutation	integrated	non-integrated	HDR	Sex	Cord	CellNumber
RNP only	SRSF2	AAV	NA	0	373	0	M	175	335000
Donor only	SRSF2	AAV	NA	0	587	0	M	175	550000
p53 only	SRSF2	AAV	mutant	88	136	0.392857143	M	175	327500
p53+RS-1	SRSF2	AAV	mutant	22	105	0.173228346	M	175	175500
p53+AZD	SRSF2	AAV	mutant	274	16	0.944827586	F	176
p53+AZD	SRSF2	AAV	mutant	163	72	0.69361702	M	177
p53+AZD	SRSF2	AAV	mutant	342	38	0.9	M	175	207500
p53+AZD	SRSF2	AAV	mutant	211	95	0.68954248	F	178
p53+AZD	SRSF2	AAV	mutant	191	113	0.62828947	F	179
p53+AZD	SRSF2	AAV	mutant	253	115	0.6875	F	180
p53+AZD+RS-1	SRSF2	AAV	mutant	192	22	0.897196262	M	175	125000
Ctrl w/o mol	SRSF2	AAV	mutant	24	458	0.049792531	F	101	450000
p53 only	SRSF2	AAV	mutant	76	334	0.185365854	F	101	375500
p53+RS-1	SRSF2	AAV	mutant	27	290	0.085173502	F	101	255000
p53+AZD	SRSF2	AAV	mutant	196	66	0.748091603	F	101	345500
p53+AZD+RS-1	SRSF2	AAV	mutant	61	126	0.326203209	F	101	175000
p53+AZDlow	SRSF2	short oligo	mutant	51	256	0.16612378	F	101
p53+AZDlow	SRSF2	short oligo	mutant	203	228	0.47099768	M	102
p53+AZDlow	SRSF2	short oligo	mutant	423	433	0.49415888	F	201
p53+AZDlow	SRSF2	short oligo	mutant	402	498	0.44666667	F	203
p53+AZDlow	SRSF2	short oligo	silent	NA	NA	0.91	F	204
p53+AZDlow	SRSF2	short oligo	silent	NA	NA	0.93	M	205
p53+AZDlow	SRSF2	short oligo	silent	NA	NA	0.62	F	103
RNP only	SF3B1	AAV	mutant	NA	NA	0	F	103
Donor only	SF3B1	AAV	mutant	NA	NA	0	F	103
Ctrl w/o mol	SF3B1	AAV	mutant	NA	NA	0	F	103
p53 only	SF3B1	AAV	mutant	104	525	0.165341812	F	103
p53+RS-1	SF3B1	AAV	mutant	64	389	0.141280353	F	103
p53+AZD	SF3B1	AAV	mutant	237	284	0.454894434	F	103
p53+AZD	SF3B1	AAV	mutant	209	98	0.68078176	M	105
p53+AZD	SF3B1	AAV	mutant	230	161	0.58823529	M	106
p53+AZD	SF3B1	AAV	mutant	172	106	0.61870504	M	107
p53+AZD	SF3B1	AAV	mutant	116	138	0.45669291	F	106
p53+AZD+RS-1	SF3B1	AAV	mutant	227	346	0.396160558	M	108
p53+AZD	SRSF2	AAV	mutant	274	16	0.92194093	F	307
p53+AZDlow	SRSF2	AAV	mutant	NA	NA	1	F	130/140
p53+AZDlow	SRSF2	short oligo	silent	NA	NA	0.9	F	130/140
p53+AZDlow	SRSF2	short oligo	mutant	NA	NA	0.48847262	F	130/140
p53+AZDlow	SRSF2	AAV	mutant	NA	NA	0.94285714	F	147
p53+AZDlow	SRSF2	short oligo	silent	NA	NA	0.55	F	147
p53+AZDlow	SRSF2	short oligo	mutant	NA	NA	0.48909657	F	147
p53+AZDlow	SRSF2	AAV	mutant	NA	NA	0.97797927	M	143
p53+AZDlow	SRSF2	short oligo	silent	NA	NA	0.93	M	143
p53+AZDlow	SRSF2	short oligo	mutant	NA	NA	0.4910045	M	143
p53+AZDlow	SRSF2	AAV	mutant	NA	NA	0.954983923	M	157
p53+AZDlow	SRSF2	short oligo	silent	NA	NA	0.73	M	157
p53+AZDlow	SRSF2	short oligo	mutant	NA	NA	0.482912333	M	157
p53+AZDlow	SRSF2	AAV	mutant	NA	NA	0.959785523	F	145
p53+AZDlow	SRSF2	short oligo	silent	NA	NA	0.82	F	145
p53+AZDlow	SRSF2	short oligo	silent	NA	NA	0.92	M	191
p53+AZDlow	SRSF2	short oligo	silent	NA	NA	0.94	M	189
p53+AZDlow	SRSF2	short oligo	silent	NA	NA	0.94	M	193
p53+AZDlow	SRSF2	short oligo	mutantNT	NA	NA	0.94	M	193
p53+AZDlow	SRSF2	short oligo	mutantNT	NA	NA	0.91	M	197
p53+AZDlow	SRSF2	short oligo	mutantNT	NA	NA	0.93	F	181
p53 only	SRSF2	AAV	mutant	587	410	0.5887663	F	167	300000
p53+RS-1	SRSF2	AAV	mutant	503	490	0.50654582	F	167	175000
p53+AZD	SRSF2	AAV	mutant	724	26	0.96533333	F	167	257500
p53+AZD+RS-1	SRSF2	AAV	mutant	382	50	0.88425926	F	167	125000
RNP only	SRSF2	AAV	NA	0	48	0	F	167	300000
Donor only	SRSF2	AAV	NA	0	679	0	F	167	340000
Ctrl	SRSF2	AAV	NA	0	1749	0	F	167	475000
