# Supplementary material for: Near-perfect precise on-target editing of human hematopoietic stem and progenitor cells
Source: eLife journal article supplement (doi:10.7554/elife.91288), 2023-10-05
Supplement: data3 [file Source Data - Figure 2E.xlsx]

## Sheet: Figure 2E mean vs conditions
Gene	donor	score	numberofconditions	sex	cord
SRSF2	AAV	0.54	12	M	191
SRSF2	AAV	0.56	12	M	189
SRSF2	AAV	0.712389381	12	M	157
SRSF2	AAV	0.721649485	12	F	159
SRSF2	AAV	0.944827586	6	F	401
SRSF2	AAV	0.69361702	6	M	402
SRSF2	AAV	0.9	6	M	404
SRSF2	AAV	0.68954248	6	F	405
SRSF2	AAV	0.62828947	6	F	406
SRSF2	AAV	0.6875	6	F	407
SRSF2	AAV	0.748091603	6	F	408
SRSF2	AAV	0.92194093	6	F	409
SRSF2	AAV	1	4	F	130/140
SRSF2	AAV	0.94285714	4	F	147
SRSF2	AAV	0.97797927	4	M	143
SRSF2	AAV	0.954983923	4	M	157
SRSF2	AAV	0.959785523	3	F	145
SRSF2	AAV	0.96533333	3	F	167
SRSF2	AAV	0.74959178	8	F	303/403
SRSF2	AAV	0.76330076	8	F	303/403
SRSF2	AAV	0.64035088	8	M	153
SRSF2	AAV	0.74193548	8	M	153
SRSF2	AAV	0.69030733	8	F	141
SRSF2	AAV	0.75802469	8	F	141
