# Supplementary material for: Near-perfect precise on-target editing of human hematopoietic stem and progenitor cells
Source: eLife journal article supplement (doi:10.7554/elife.91288), 2023-10-05
Supplement: data3 [file Source Data - Figure 2H.xlsx]

## Sheet: Figure 2H
Condition	Cord	Sex	Sample	Region	ExpectedTargetRef	ExpectedTargetIns	ExpectedTargetDel	ExpectedTargetSub
Unedited	181	M	1	chr4:1950501-1950520	99.3652	0	0	0.634752
Edited	181	M	1	chr4:1950501-1950520	99.2029	0	0	0.797116
Edited with AZD7648	181	M	1	chr4:1950501-1950520	98.8162	0	0	1.18384
Unedited	203	M	2	chr4:1950501-1950520	99.3419	0	0	0.658056
Edited	203	M	2	chr4:1950501-1950520	99.1038	0	0	0.896199
Edited with AZD7648	203	M	2	chr4:1950501-1950520	98.4222	0	0	1.5778
Unedited	263	F	3	chr4:1950501-1950520	99.7577	0	0	0.242326
Edited	263	F	3	chr4:1950501-1950520	98.7118	0	0	1.28824
Edited with AZD7648	263	F	3	chr4:1950501-1950520	99.348	0	0	0.651997
Unedited	181	M	1	chr8:6748019-6748038	95.1166	0	0	4.88337
Edited	181	M	1	chr8:6748019-6748038	96.4957	0	0	3.5043
Edited with AZD7648	181	M	1	chr8:6748019-6748038	96.1057	0	0	3.89435
Unedited	203	M	2	chr8:6748019-6748038	97.823	0	0	2.17698
Edited	203	M	2	chr8:6748019-6748038	97.8534	0	0	2.14663
Edited with AZD7648	203	M	2	chr8:6748019-6748038	95.4277	0	0	4.57231
Unedited	263	F	3	chr8:6748019-6748038	96.1919	0	0	3.8081
Edited	263	F	3	chr8:6748019-6748038	98.1758	0	0	1.82419
Edited with AZD7648	263	F	3	chr8:6748019-6748038	96.5525	0	0	3.44752
Unedited	181	M	1	chr17:78885512-78885531	99.4486	0	0	0.551401
Edited	181	M	1	chr17:78885512-78885531	99.8325	0	0	0.167504
Edited with AZD7648	181	M	1	chr17:78885512-78885531	99.3775	0	0	0.622526
Unedited	203	M	2	chr17:78885512-78885531	99.5786	0	0	0.421351
Edited	203	M	2	chr17:78885512-78885531	99.6445	0	0	0.355468
Edited with AZD7648	203	M	2	chr17:78885512-78885531	99.646	0	0	0.354013
Unedited	263	F	3	chr17:78885512-78885531	99.6645	0	0	0.335548
Edited	263	F	3	chr17:78885512-78885531	99.5866	0	0	0.413388
Edited with AZD7648	263	F	3	chr17:78885512-78885531	99.3958	0	0	0.604153
