# Supplementary material for: Near-perfect precise on-target editing of human hematopoietic stem and progenitor cells
Source: eLife journal article supplement (doi:10.7554/elife.91288), 2023-10-05
Supplement: data3 [file Source Data - Figure 3.xlsx]

## Sheet: Figure 3F clone zygosity
Experiment	Donor	Sex	Conditions	Bulk integration rate	E_HomWT	E_Het	E_Mut	GM_HomWT	GM_Het	GM_Mut	WT	Het	Mut
1	130/140	F	AAV w RNP	1	3	1	4	0	3	3	3	4	7
1	130/140	F	sil w RNP	0.9	0	2	4	0	2	6	0	4	10
1	130/140	F	mut w RNP	0.48847262	3	1	0	3	0	0	6	1	0
2	147	F	AAV w RNP	0.94285714	0	3	1	0	3	1	0	6	2
2	147	F	sil w RNP	0.55	2	1	2	0	2	4	2	3	6
2	147	F	mut w RNP	0.48909657	4	0	1	2	1	3	6	1	4
3	143	M	AAV w RNP	0.97797927	4	1	3	2	1	2	6	2	5
3	143	M	sil w RNP	0.93	0	1	5	0	1	4	0	2	9
3	143	M	mut w RNP	0.4910045	2	1	2	0	0	1	2	1	3
