# Supplementary material for: Near-perfect precise on-target editing of human hematopoietic stem and progenitor cells
Source: eLife journal article supplement (doi:10.7554/elife.91288), 2023-10-05
Supplement: data3 [file Source Data - Figure 3A.xlsx]

## Sheet: Figure 3A sil 4 sub-pop
Gene	subpop	HDR	sex
SRSF2	bulk	0.70	F
SRSF2	long	0.63	F
SRSF2	int	0.53	F
SRSF2	multi	0.72	F
SRSF2	adv	0.62	F
SRSF2	bulk	0.68	F
SRSF2	long	0.70	F
SRSF2	int	0.51	F
SRSF2	multi	0.74	F
SRSF2	adv	0.68	F
SRSF2	bulk	0.94	M
SRSF2	long	0.96	M
SRSF2	int	0.96	M
SRSF2	multi	0.92	M
SRSF2	adv	0.95	M
