# Supplementary material for: Near-perfect precise on-target editing of human hematopoietic stem and progenitor cells
Source: eLife journal article supplement (doi:10.7554/elife.91288), 2023-10-05
Supplement: data3 [file Source Data - Figure 3B.xlsx]

## Sheet: Figure 3B sil 4 sub-pop %
replicates	Condition	Population	Bead factor	Number of cells	Absolute cell number	Percentage of 4 sub-pop among the CD34+
139	Ctrl elec	Living cells	0.281622	31371	111394	NA
139	Ctrl elec	CD34+	0.281622	16849	59828.4	NA
139	Ctrl elec	CD34+ CD45RA+	0.281622	5471	19426.7	0.324708
139	Ctrl elec	CD34+ CD45RA-CD90-CD49c-	0.281622	9234	32788.6	0.548044
139	Ctrl elec	CD34+ CD45RA-CD90+CD49c-	0.281622	750	2663.14	0.044513
139	Ctrl elec	CD34+ CD45RA-CD90+CD49c+	0.281622	23	81.6697	0.00136507
139	donor only	Living cells	0.442094	3765	8516.28	NA
139	donor only	CD34+	0.442094	2274	5143.7	NA
139	donor only	CD34+ CD45RA+	0.442094	429	970.381	0.188654
139	donor only	CD34+ CD45RA-CD90-CD49c-	0.442094	1495	3381.63	0.657432
139	donor only	CD34+ CD45RA-CD90+CD49c-	0.442094	133	300.841	0.0584872
139	donor only	CD34+ CD45RA-CD90+CD49c+	0.442094	6	13.5718	0.00263852
139	RNP only	Living cells	0.524538	50653	96566.9	NA
139	RNP only	CD34+	0.524538	26851	51189.8	NA
139	RNP only	CD34+ CD45RA+	0.524538	8210	15651.9	0.305761
139	RNP only	CD34+ CD45RA-CD90-CD49c-	0.524538	15287	29143.7	0.569327
139	RNP only	CD34+ CD45RA-CD90+CD49c-	0.524538	1309	2495.53	0.0487505
139	RNP only	CD34+ CD45RA-CD90+CD49c+	0.524538	38	72.4447	0.00141522
139	silent donor	Living cells	0.120739	35721	295852	NA
139	silent donor	CD34+	0.120739	17045	141172	NA
139	silent donor	CD34+ CD45RA+	0.120739	3744	31009	0.219654
139	silent donor	CD34+ CD45RA-CD90-CD49c-	0.120739	10948	90674.8	0.6423
139	silent donor	CD34+ CD45RA-CD90+CD49c-	0.120739	977	8091.82	0.0573189
139	silent donor	CD34+ CD45RA-CD90+CD49c+	0.120739	43	356.139	0.00252273
175	Ctrl elec	Living cells	0.300308	39779	132461	NA
175	Ctrl elec	CD34+	0.300308	27077	90164.1	NA
175	Ctrl elec	CD34+ CD45RA+	0.300308	6181	20582.2	0.228275
175	Ctrl elec	CD34+ CD45RA-CD90-CD49c-	0.300308	18172	60511.2	0.671123
175	Ctrl elec	CD34+ CD45RA-CD90+CD49c-	0.300308	759	2527.41	0.0280312
175	Ctrl elec	CD34+ CD45RA-CD90+CD49c+	0.300308	18	59.9385	0.000664771
175	donor only	Living cells	0.538398	17681	32840	NA
175	donor only	CD34+	0.538398	12960	24071.4	NA
175	donor only	CD34+ CD45RA+	0.538398	2526	4691.69	0.194907
175	donor only	CD34+ CD45RA-CD90-CD49c-	0.538398	9039	16788.7	0.697454
175	donor only	CD34+ CD45RA-CD90+CD49c-	0.538398	437	811.667	0.0337191
175	donor only	CD34+ CD45RA-CD90+CD49c+	0.538398	21	39.0046	0.00162037
175	RNP only	Living cells	0.212731	36332	170788	NA
175	RNP only	CD34+	0.212731	25625	120457	NA
175	RNP only	CD34+ CD45RA+	0.212731	6602	31034.5	0.257639
175	RNP only	CD34+ CD45RA-CD90-CD49c-	0.212731	16347	76843.5	0.637932
175	RNP only	CD34+ CD45RA-CD90+CD49c-	0.212731	878	4127.28	0.0342634
175	RNP only	CD34+ CD45RA-CD90+CD49c+	0.212731	23	108.118	0.000897561
175	silent donor	Living cells	0.177721	38130	214550	NA
175	silent donor	CD34+	0.177721	25340	142583	NA
175	silent donor	CD34+ CD45RA+	0.177721	4032	22687.3	0.159116
175	silent donor	CD34+ CD45RA-CD90-CD49c-	0.177721	18857	106105	0.744159
175	silent donor	CD34+ CD45RA-CD90+CD49c-	0.177721	764	4298.88	0.03015
175	silent donor	CD34+ CD45RA-CD90+CD49c+	0.177721	20	112.536	0.000789266
149	Ctrl elec	Living cells	0.229877	48250	209895	NA
149	Ctrl elec	CD34+	0.229877	30941	134598	NA
149	Ctrl elec	CD34+ CD45RA+	0.229877	7346	31956.2	0.23742
149	Ctrl elec	CD34+ CD45RA-CD90-CD49c-	0.229877	17456	75936.3	0.564171
149	Ctrl elec	CD34+ CD45RA-CD90+CD49c-	0.229877	3111	13533.3	0.100546
149	Ctrl elec	CD34+ CD45RA-CD90+CD49c+	0.229877	18	78.3028	0.000581752
149	donor only	Living cells	0.125154	16304	130272	NA
149	donor only	CD34+	0.125154	8958	71575.8	NA
149	donor only	CD34+ CD45RA+	0.125154	1511	12073.1	0.168676
