# Supplementary material for: Near-perfect precise on-target editing of human hematopoietic stem and progenitor cells
Source: eLife journal article supplement (doi:10.7554/elife.91288), 2023-10-05
Supplement: data3 [file Source Data - Figure 3D-E.xlsx]

## Sheet: Figure 3D-E colonies
Conditions	Experiment	Donor	Sex	CellNumber	TotalColonies	CFU-GEMM	CFU-GM	BFU-E	CFU-E
Ctrl elec	1	130/140	F	500	90	14	44	32	0
AAV w/o RNP	1	130/140	F	500	64	6	28	30	0
AAV w RNP	1	130/140	F	1500	39	2	23	14	0
sil w/o RNP	1	130/140	F	500	76	18	32	26	0
sil w RNP	1	130/140	F	1500	153	27	53	73	0
mut w/o RNP	1	130/140	F	500	99	15	43	41	0
mut w RNP	1	130/140	F	1500	13	0	9	4	0
Ctrl elec	2	147	F	500	98	5	41	52	0
AAV w/o RNP	2	147	F	1500	137	16	51	70	0
AAV w RNP	2	147	F	1500	15	0	12	3	0
sil w/o RNP	2	147	F	1500	85	8	31	46	0
sil w RNP	2	147	F	1500	88	4	44	40	0
mut w/o RNP	2	147	F	1500	79	4	32	43	0
mut w RNP	2	147	F	1500	18	0	12	6	0
Ctrl elec	3	143	M	500	74	4	39	31	0
AAV w/o RNP	3	143	M	1500	153	9	47	97	0
AAV w RNP	3	143	M	1500	47	0	31	16	0
sil w/o RNP	3	143	M	1500	160	8	55	97	0
sil w RNP	3	143	M	1500	68	2	27	39	0
mut w/o RNP	3	143	M	1500	168	12	52	104	0
mut w RNP	3	143	M	1500	24	0	16	8	0
Ctrl elec	4	145	F	500	120	6	42	72	0
AAV w/o RNP	4	145	F	1500	182	12	63	107	0
AAV w RNP	4	145	F	1500	21	0	13	8	0
sil w/o RNP	4	145	F	1500	158	13	62	83	0
sil w RNP	4	145	F	1500	84	3	32	49	0
mut w/o RNP	4	145	F	1500	100	6	39	55	0
mut w RNP	4	145	F	1500	19	0	12	7	0
