# Supplementary material for: Near-perfect precise on-target editing of human hematopoietic stem and progenitor cells
Source: eLife journal article supplement (doi:10.7554/elife.91288), 2023-10-05
Supplement: data3 [file Source Data - Figure 3G.xlsx]

## Sheet: Figure 3G-I LTC-IC
Cord	Conditions	Wells	High	Small	Transient	High	Small	Transient
245 (M)	Control	26	5	4	4	0.192308	0.153846	0.153846
	Edit	25	2	2	1	0.08	0.08	0.04
F	Control	19	3	4	1	0.157895	0.210526	0.0526316
	Edit	26	4	0	0	0.153846	0	0
M	Control	23	2	0	1	0.0869565	0	0.0434783
	Edit	27	2	1	1	0.0740741	0.037037	0.037037
Cord	Wells	Week1	Week2	Week3	Week4	Week5	Week6	Week7
245	B2	0	0	0	0	0	0	0
245	B3	0	0	0	0	0	0	0
245	B4	0	0	1	0	0	0	0	transient
245	B5	0	0	0	0	0	0	0
245	B6	0	0	0	1	1	1	1
245	B7	0	0	0	0	0	0	0
245	B8	0	0	1	1	1	1	1
245	B9	0	0	0	1	1	1	1
245	B10	0	0	0	0	0	0	0
245	C2	0	1	1	1	1	1	1
245	C3	0	0	0	0	0	0	0
245	C4	0	0	0	0	1	1	1
245	C5	0	0	0	0	0	1	1
245	C6	0	0	0	0	0	1	1
245	C7	0	0	0	0	0	0	0
245	C8	0	0	1	1	1	0	0	transient
245	C9	0	0	0	1	1	0	0	transient
245	C10	0	0	0	0	1	0	0	transient
245	D3	0	0	0	0	0	0	0
245	D4	0	0	0	0	0	0	0
245	D5	0	0	0	0	0	0	0
245	D6	0	0	0	0	0	0	0
245	D7	0	0	0	0	0	0	1
245	D8	0	0	0	0	0	1	1
245	D9	0	0	0	0	0	0	0
245	D10	0	0	0	0	0	0	0
245	E3	0	0	0	0	0	0	0
245	E4	0	0	0	0	0	0	0
245	E5	0	0	0	0	0	0	0
245	E6	0	0	0	0	0	0	0
245	E7	0	0	0	0	0	0	0
245	E8	0	0	0	0	0	0	0
245	E9	0	0	0	0	0	0	0
245	E10	0	0	0	0	0	0	0
245	F2	0	0	0	0	0	0	0
245	F3	0	0	0	0	0	0	0
245	F4	0	0	0	0	0	0	0
245	F5	0	0	0	0	0	0	0
245	F6	0	0	0	0	0	0	0
245	F7	0	0	0	0	0	0	0
245	F8	0	0	0	0	0	0	0
245	F9	0	0	0	0	0	0	0
245	F10	0	0	0	0	0	0	0
245	G3	0	0	0	0	1	1	0	transient
245	G4	0	0	0	0	0	0	1
245	G5	0	0	0	0	0	0	0
245	G6	0	0	0	0	0	0	1
245	G7	0	0	0	0	0	0	0
245	G8	0	0	0	0	0	0	0
245	G9	0	0	1	1	1	1	1
245	G10	0	1	0	1	1	1	1
F	B2	0	0	0	0	0	0	0
F	B3	0	0	0	0	0	0	0
F	B4	0	0	0	0	0	0	0
F	B5	0	1	1	1	1	1	1
F	B6	0	0	0	0	0	0	0
F	B7	0	1	1	1	1	1	1
F	C2	0	0	0	0	1	1	1
F	C3	0	0	0	0	0	0	0
F	C4	0	0	0	0	0	0	0
F	C5	0	0	0	0	0	0	0
F	C6	0	1	1	1	1	1	1
F	C7	0	0	0	0	0	0	0
F	C8	0	1	1	1	1	1	1
F	C9	0	1	1	1	1	1	1
F	C10	0	0	0	0	0	0	0
F	D2	0	0	0	0	0	0	0
F	D3	0	1	1	1	1	1	1
F	D4	0	0	0	0	0	0	0
F	D5	0	0	0	0	0	0	0
F	E2	0	0	0	0	0	0	0
F	E3	0	0	0	0	0	0	0
F	E4	0	0	0	0	0	0	0
F	E5	0	0	0	0	0	0	0
F	E6	0	0	0	0	0	0	0
F	E7	0	1	1	1	1	1	1
F	E8	0	0	0	0	0	0	0
F	E9	0	0	0	0	0	1	1
F	E10	0	0	0	1	1	1	1
F	F2	0	0	0	0	0	0	0
F	F3	0	0	0	0	0	0	0
F	F4	0	0	0	0	0	0	0
F	F5	0	0	0	0	0	0	0
F	F6	0	0	0	0	0	0	0
F	F7	0	0	0	0	0	0	0
F	F8	0	0	0	0	0	0	0
F	F9	0	0	1	1	1	1	1
F	F10	0	0	0	0	0	0	0
F	G2	0	0	0	0	0	0	0
F	G3	0	0	0	0	0	0	0
F	G4	0	0	0	0	0	0	0
F	G5	0	0	0	0	0	0	0
F	G6	0	0	0	0	0	0	0
F	G7	0	0	0	0	0	0	0
F	G8	0	0	0	0	0	0	0
F	G9	0	0	0	0	0	0	0
M	B2	1	1	1	1	1	1	1
M	B3	0	0	0	0	0	0	0
M	B4	0	0	0	0	0	0	0
M	B5	0	0	0	0	0	0	0
M	B6	0	0	0	0	0	0	0
M	B7	0	0	0	0	0	0	0
M	B8	0	0	0	0	0	0	0
M	C2	0	0	0	0	0	0	0
M	C3	0	0	0	0	0	0	0
M	C4	0	0	0	0	0	0	0
M	C5	0	0	0	0	0	0	0
M	C6	0	0	1	1	1	1	1
M	C7	0	0	0	0	0	0	0
M	C8	0	0	0	0	0	0	0
M	C9	0	0	0	0	0	0	0
M	C10	0	0	0	0	0	0	0
M	D2	0	1	0	0	0	0	0	transient
M	D3	0	1	1	1	1	1	1
M	D4	0	0	0	0	0	0	0
M	D5	0	0	0	0	0	0	0
M	D6	0	0	0	0	0	0	0
M	D7	0	0	0	0	0	0	0
M	D8	0	0	0	0	0	0	0
M	D10	0	0	0	0	0	0	0
M	E2	0	0	0	0	0	0	0
M	E3	0	0	0	0	0	0	0
M	E4	0	0	0	0	0	0	0
M	E5	0	0	0	0	0	0	0
M	E6	0	0	0	0	0	0	0
M	E7	0	0	0	0	0	0	0
M	E8	0	0	0	0	0	0	0
M	E9	0	0	0	0	0	0	0
M	E10	0	0	0	0	0	0	0
M	F2	0	1	1	1	1	1	1
M	F3	0	0	0	0	0	0	0
M	F4	0	0	0	0	0	0	0
M	F5	0	1	1	1	1	1	0	transient
M	F6	0	0	0	0	0	0	0
M	F7	0	0	0	0	0	0	0
M	F8	0	0	0	0	0	0	0
M	F9	0	0	0	0	0	0	0
M	F10	0	0	0	0	0	0	0
M	G2	0	0	0	0	0	1	0	transient
M	G3	0	0	0	0	0	0	0
M	G4	0	0	0	0	0	0	0
M	G5	0	0	0	0	0	0	0
M	G6	0	0	0	0	0	0	0
M	G7	0	0	0	0	0	0	0
M	G8	0	0	0	0	0	0	0
M	G9	0	1	1	1	1	1	1
M	G10	0	1	1	1	1	1	1
