# Supplementary material for: Near-perfect precise on-target editing of human hematopoietic stem and progenitor cells
Source: eLife journal article supplement (doi:10.7554/elife.91288), 2023-10-05
Supplement: data3 [file Source Data - Figure 4B-D.xlsx]

## Sheet: Figure 4B-D tuning assay
Cord	Sex	PercentMut	Score	Number of sorted colonies	Actual colony number	Dead/debris	Harvested colonies	~10 cells	Small colonies	Large colonies	Massive colonies	Homozygous P95H	Heterozygous	Homozygous wild-type	No PCR amplification	Weird indel
191	M	0	0	20	13	5	8	7	1	0	0	0	0	4	0	0
191	M	25	0	30	17	7	10	8	1	1	0	0	1	3	0	1
191	M	50	0.22	30	8	2	6	5	0	1	0	0	2	3	0	0
191	M	75	0.35	30	12	3	9	7	1	0	1	3	1	1	1	0
191	M	100	0.54	30	10	4	6	5	1	0	0	2	1	0	0	0
189	M	0	0	20	12	6	6	2	3	1	0	0	0	4	0	0
189	M	25	0.14	30	18	3	15	9	3	2	1	0	2	9	1	0
189	M	50	0.34	30	16	7	9	6	2	1	0	3	2	3	0	2
189	M	75	0.47	30	16	1	15	13	0	1	1	1	0	2	3	0
189	M	100	0.56	30	21	10	11	9	2	0	0	5	0	0	2	0
157	M	100	0.712389381	NA	NA	NA	NA	NA	NA	NA	NA	NA	NA	NA	NA	NA
157	M	75	0.6069869	NA	NA	NA	NA	NA	NA	NA	NA	NA	NA	NA	NA	NA
157	M	50	0.383233533	NA	NA	NA	NA	NA	NA	NA	NA	NA	NA	NA	NA	NA
157	M	25	0.171206226	NA	NA	NA	NA	NA	NA	NA	NA	NA	NA	NA	NA	NA
157	M	0	0	NA	NA	NA	NA	NA	NA	NA	NA	NA	NA	NA	NA	NA
159	F	100	0.721649485	NA	NA	NA	NA	NA	NA	NA	NA	NA	NA	NA	NA	NA
159	F	75	0.294326241	NA	NA	NA	NA	NA	NA	NA	NA	NA	NA	NA	NA	NA
159	F	50	0.215982721	NA	NA	NA	NA	NA	NA	NA	NA	NA	NA	NA	NA	NA
159	F	25	0.173633441	NA	NA	NA	NA	NA	NA	NA	NA	NA	NA	NA	NA	NA
159	F	0	0	NA	NA	NA	NA	NA	NA	NA	NA	NA	NA	NA	NA	NA
