# Supplementary material for: Near-perfect precise on-target editing of human hematopoietic stem and progenitor cells
Source: eLife journal article supplement (doi:10.7554/elife.91288), 2023-10-05
Supplement: data3 [file Source Data - Figure 4C.xlsx]

## Sheet: Figure 4C clonogenicity
Cord	Condition	Small	Large	Total	Number of cells sorted
189	100	11	0	11	30
189	75	13	2	15	30
189	50	7	1	8	30
189	25	12	3	15	30
189	0	5	1	6	20
191	100	6	0	6	30
191	75	8	1	9	30
191	50	5	1	6	30
191	25	9	1	10	30
191	0	7	1	8	20
