# Supplementary material for: Near-perfect precise on-target editing of human hematopoietic stem and progenitor cells
Source: eLife journal article supplement (doi:10.7554/elife.91288), 2023-10-05
Supplement: data3 [file Source Data - Figure S1A-B.xlsx]

## Sheet: Figure S1 A-B RNP efficiency
Gene	Guide	Cutter	CutterAmouint	HDR_Enhancer	non-cutting	cutting	score	sex	CellNumber
SRSF2	NA	NA	0	-	823	0	0		325500
SRSF2	1	Cas9	30.5	-	351	393	0.52822581	F	NA
SRSF2	1	Cas9	30.5	-	232	411	0.639191291	M	250000
SRSF2	1	Cas9	30.5	-	161	108	0.401486989	F	NA
SRSF2	1	Cas9	30.5	+	175	495	0.73880597	F	NA
SRSF2	1	Cas9	30.5	+	309	525	0.629496403	M	17000
SRSF2	1	Cas9	61	-	228	599	0.72430472	F	NA
SRSF2	1	Cas9	61	-	242	533	0.687741935	M	172500
SRSF2	1	Cas9	61	+	304	532	0.63636364	M	17500
SRSF2	NA	NA	0	-	411	0	0	F	395500
SRSF2	1	Cas9	30.5	-	373	395	0.514323	F	315000
SRSF2	1	Cas9	30.5	+	349	824	0.702472	F	27500
SRSF2	1	Cas9	61	-	232	383	0.622764	F	275500
SRSF2	1	C	61	+	248	414	0.625378	F	31750
SRSF2	2	Cas9	30.5	-	722	33	0.04370861	F	NA			+
SRSF2	2	Cas9	30.5	+	432	57	0.11656442	F	NA
SRSF2	2	Cas9	61	-	600	92	0.13294798	F	NA
SRSF2	2	Cas9	61	+	358	136	0.27530364	F	NA
SRSF2	NA	NA	0	-	NA	NA	NA	F	330000
SRSF2	2	Cas9	30.5	-	NA	NA	NA	F	262500
SRSF2	2	Cas9	30.5	+	NA	NA	NA	F	40000
SRSF2	2	Cas9	61	-	NA	NA	NA	F	172500
SRSF2	2	Cas9	61	+	NA	NA	NA	F	17500
SRSF2	1	Cas9	30.5	-	328	296	0.47435897	M	182500
SRSF2	1	Cas9	30.5	+	189	578	0.7535854	M	50000
SRSF2	1	Cas9	61	-	312	376	0.54651163	M	150000
SRSF2	1	Cas9	61	+	211	284	0.5737373737	M	30000
SF3B1	NA	NA	0	-	360	0	0		NA
SF3B1	2	Cpf1	31	-	108	223	0.673716012	F	NA
SF3B1	2	Cpf1	31	-	163	113	0.59057971	M	NA
SF3B1	2	Cpf1	31	-	497	255	0.339095745	M	NA
SF3B1	2	Cpf1	31	-	156	233	0.40102828	F	NA
SF3B1	2	Cpf1	31	-	261	166	0.61124122	F	NA
SF3B1	2	Cpf1	31	+	54	246	0.82	M	NA
SF3B1	2	Cpf1	31	+	323	128	0.71618625	F	NA
SF3B1	2	Cpf1	31	+	261	166	0.61124122	M	NA
SF3B1	2	Cpf1	62	-	234	473	0.33097595	M	NA
SF3B1	2	Cpf1	62	-	229	48	0.173285199	F	NA
SF3B1	2	Cpf1	62	-	487	253	0.65810811	M	NA
SF3B1	2	Cpf1	62	+	370	140	0.7254902	M	NA
SF3B1	2	Cpf1	62	+	391	204	0.65714286	F	NA
SF3B1	2	Cpf1	62	+	108	132	0.55	M	NA
SF3B1	1	Cas9	30.5	-	114	280	0.2893401	F	NA
SF3B1	1	Cas9	30.5	-	337	145	0.300829876	F	NA
SF3B1	1	Cas9	30.5	-	256	64	0.2	F	NA
SF3B1	1	Cas9	30.5	-	170	51	0.23076923	M	NA
SF3B1	1	Cas9	30.5	+	287	160	0.35794183	F	NA
SF3B1	1	Cas9	30.5	+	112	95	0.4589372	F	NA
SF3B1	1	Cas9	30.5	+	171	236	0.42014742	F	NA
SF3B1	1	Cas9	30.5	+	545	161	0.228045326	M	NA
SF3B1	1	Cas9	61	-	190	86	0.3115942	F	NA
SF3B1	1	Cas9	61	-	291	130	0.3087886	F	NA
SF3B1	1	Cas9	61	-	154	351	0.3049505	F	NA
SF3B1	1	Cas9	61	-	714	184	0.204899777	M	NA
SF3B1	1	Cas9	61	+	164	310	0.34599156	F	NA
SF3B1	1	Cas9	61	+	252	223	0.46947368	F	NA
SF3B1	1	Cas9	61	+	299	176	0.37052632	M	NA
GNB1	NA	NA	0	-	360	0	0		NA
GNB1	1	Cas9	30.5	-	351	46	0.11586902	F	NA
GNB1	1	Cas9	30.5	+	108	164	0.60294118	M	NA
GNB1	1	Cas9	61	-	179	84	0.31939163	F	NA
GNB1	1	Cas9	61	+	126	184	0.59354839	M	NA
GNB1	2	Cas9	30.5	-	155	74	0.3231441	F	NA
GNB1	2	Cas9	30.5	+	210	124	0.37125749	M	NA
GNB1	2	Cas9	61	-	118	97	0.45116279	F	NA
GNB1	2	Cas9	61	+	168	138	0.45098039	M	NA
