# Supplementary material for: Near-perfect precise on-target editing of human hematopoietic stem and progenitor cells
Source: eLife journal article supplement (doi:10.7554/elife.91288), 2023-10-05
Supplement: data3 [file Source Data -Figure 2A-B.xlsx]

## Sheet: Figure 2A-B AZD vs MM
Conditions	Gene	integrated	non-integrated	HDR	sex	Cellnumber
Ctrl	SRSF2	0	1460	0	F	535000
Donor only	SRSF2	0	885	0	F	330000
RNP only	SRSF2	0	810	0	F	230000
w/o mol	SRSF2	252	623	0.288	F	245000
0.5µM AZD7648	SRSF2	529	177	0.74959178	F	237500
5µM AZD7648	SRSF2	703	218	0.76330076	F	197500
0.5µM M3814	SRSF2	451	326	0.58043758	F	200000
5µM M3814	SRSF2	336	172	0.66141732	F	185000
Ctrl	SRSF2	0	802	0	M	430000
Donor only	SRSF2	0	552	0	M	330000
RNP only	SRSF2	0	679	0	M	370000
w/o mol	SRSF2	165	571	0.22418478	M	272500
0.5µM AZD7648	SRSF2	292	164	0.64035088	M	312500
5µM AZD7648	SRSF2	437	152	0.74193548	M	252500
0.5µM M3814	SRSF2	228	281	0.44793713	M	257500
5µM M3814	SRSF2	180	177	0.50420168	M	187500
Ctrl	SRSF2	0	512	0	F	450000
Donor only	SRSF2	0	446	0	F	285000
RNP only	SRSF2	0	725	0	F	255000
w/o mol	SRSF2	149	286	0.34252874	F	250000
0.5µM AZD7648	SRSF2	292	131	0.69030733	F	242500
5µM AZD7648	SRSF2	307	98	0.75802469	F	197500
0.5µM M3814	SRSF2	264	263	0.50094877	F	195000
5µM M3814	SRSF2	298	128	0.69953052	F	175000
